# Supplementary material for: From Reef to Table: Social and Ecological Factors Affecting Coral Reef Fisheries, Artisanal Seafood Supply Chains, and Seafood Security
Source: PubMed Central journal article supplement (PMC4526684; doi:10.1371/journal.pone.0123856), 2015-08-05
Supplement: pone.0123856.s002.pdf [file pone.0123856.s002.pdf]

For Public Data Repository: PONE-D-14-49291

**TITLE: From reef to table: social and ecological factors affecting coral reef fisheries, artisanal seafood supply chains, and seafood security**

**AUTHORS:** John N. Kittinger<sup>1,2</sup>, Lida T. Teneva<sup>1</sup>, Haruko Koike<sup>3</sup>, Kostantinos A. Stamoulis<sup>3</sup>, Daniela S. Kittinger<sup>2</sup>, Kirsten L. L. Oleson<sup>4</sup>, Eric Conklin<sup>5</sup>, Mahana Gomes<sup>6</sup>, Bart Wilcox<sup>6</sup>, Alan M. Friedlander<sup>3,7</sup>

| <i>Expanded Total Biomass by Trophic Group (kg)</i> |                              |                       |                                           |            |                       |                   |                            |                     |               |
|-----------------------------------------------------|------------------------------|-----------------------|-------------------------------------------|------------|-----------------------|-------------------|----------------------------|---------------------|---------------|
| <i>Structure</i>                                    | <i>Area (km<sup>2</sup>)</i> | <i># Survey Sites</i> | <i>Average biomass (g m<sup>-2</sup>)</i> | <i>±SE</i> | <i>Apex Predators</i> | <i>Herbivores</i> | <i>Secondary Consumers</i> | <i>Planktivores</i> | <i>Total</i>  |
| <b>Rock/Boulder</b>                                 | 1.15                         | 58                    | 25.3                                      | 2.8        | 1,418                 | 13,310            | 11,194                     | 3,180               | 29,103        |
| <b>Pavement with Sand Channels</b>                  | 0.44                         | 36                    | 22.9                                      | 3.6        | 0                     | 3,611             | 5,525                      | 979                 | 10,115        |
| <b>Aggregate Reef</b>                               | 0.25                         | 18                    | 36.3                                      | 5.3        | 120                   | 2,405             | 5,944                      | 650                 | 9,118         |
| <b>Sand</b>                                         | 0.71                         | N/A                   | N/A                                       | N/A        | N/A                   | N/A               | N/A                        | N/A                 | <b>N/A</b>    |
| <b>Total</b>                                        | 2.55                         | 112                   |                                           |            | 1,538                 | 19,326            | 22,663                     | 4,810               | <b>48,337</b> |

**Table 1.** Area, number of survey sites, and average biomass for each habitat structure category surveyed in Kīholo Bay. Sand habitat was not surveyed and not included in this table, though it makes up an additional 0.71 km<sup>2</sup> of habitat area (28%) in the bay. SE is standard error of the mean for transect biomass values in each category. Average biomass was expanded to the total area of each

habitat structure category by trophic group, resulting in an estimate of total standing stock of resource fishes.

| <i>Fishing method</i> | <i>Gear Type</i>        | <i>Fishing Hours</i> | <i>Mean</i> | <i>CPUE<br/>COV</i> | <i>N</i> |
|-----------------------|-------------------------|----------------------|-------------|---------------------|----------|
| <b>Line Fishing</b>   | Hand pole               | 2745                 | 7.5         | 0.9                 | 21       |
| <b>Line Fishing</b>   | Rod and reel            | 2259                 | 6.2         | 0.1                 | 17       |
| <b>Thrownet</b>       | Thrownet                | 1434                 | 3.9         | 0.09                | 43       |
| <b>Spear</b>          | 3-prong; speargun       | 799                  | 2.2         | 0.05                | 15       |
| <b>Other</b>          | Limpet (Opihi) Gleaning | 460                  | 1.3         | 0.06                | 6        |
| <b>Other</b>          | Crabbing                | 146                  | 0.4         | 0.02                | 3        |
| <b>Other</b>          | Aquarium                | 84                   | 0.2         | 0.01                | 1        |
| <b>Other</b>          | Other                   | <b>88</b>            | <b>0.4</b>  | <b>0.02</b>         | <b>1</b> |

**Table 2.** Dominant fishing methods, total effort (fishing hours), and catch per unit effort (CPUE in kg day<sup>-1</sup>) with means and coefficient of variation (COV) from the one-year creel survey at Kīholo Bay. Number of observed events is also included. Line

fishing includes hand pole, rod-and-reel, and flyfishing. Spear includes 3-prong pole spear and band-powered speargun. Other methods include limpet (*'opihi*, in Hawaiian) gleaning, crabbing, aquarium fishing.

| <i>This study, Kīholo Bay, 2012-2013</i> | <i>Apex<br/>predators</i> | <i>Secondary<br/>Consumer</i> | <i>Herbivore</i> | <i>Planktivore</i> | <i>Other<br/>(including<br/>invertebrates)</i> | <i>Total by<br/>gear<br/>type</i> | <i>% of<br/>total by<br/>gear<br/>type</i> |
|------------------------------------------|---------------------------|-------------------------------|------------------|--------------------|------------------------------------------------|-----------------------------------|--------------------------------------------|
| Line Fishing                             | 843                       | 284                           | 20               | 1891               | 0                                              | 3038                              | 41.3                                       |
| Thrownet                                 | 0                         | 159                           | 2279             | 16                 | 70                                             | 2524                              | 34.3                                       |
| Spear                                    | 0                         | 1038                          | 297              | 3                  | 0                                              | 1338                              | 18.2                                       |
| Other                                    | 0                         | 102                           | 284              | 0                  | 67                                             | 453                               | 6.2                                        |
| <b>Total by trophic group</b>            | <b>843</b>                | <b>1583</b>                   | <b>2880</b>      | <b>1909</b>        | <b>137</b>                                     | <b><u>7353</u></b>                |                                            |
| <b>% of total by trophic group</b>       | <b>11</b>                 | <b>22</b>                     | <b>39</b>        | <b>26</b>          | <b>2</b>                                       |                                   |                                            |

**Table 3.** Total reconstructed catch (in kilograms) for May 1, 2012 – April 30, 2013 for Kīholo Bay by gear type and trophic group.

| <i>Year</i> | <i>Total catch (kg)</i> | <i>Total value (\$)</i> | <i>'ōpelu (Decapterus spp) fraction of catch (%)</i> | <i>'ōpelu (Decapterus spp) fraction of value (%)</i> |
|-------------|-------------------------|-------------------------|------------------------------------------------------|------------------------------------------------------|
| <b>2009</b> | 4,246                   | 48,483                  | 51                                                   | 44                                                   |
| <b>2010</b> | 6,859                   | 78,794                  | 56                                                   | 49                                                   |
| <b>2011</b> | 8,380                   | 100,538                 | 48                                                   | 40                                                   |
| <b>2012</b> | 6,448                   | 75,992                  | 62                                                   | 53                                                   |
| <b>2013</b> | 5,159                   | 54,054                  | 71                                                   | 68                                                   |
| <b>Mean</b> | 6,218                   | 71,572                  | 58                                                   | 51                                                   |
| <b>± SE</b> | ± 712                   | ± 4,184                 | ± 2                                                  | ± 2                                                  |

**Table 4.** Commercial catch (kg) reported to DAR 2009-2013 for the commercial reporting block surrounding Kīholo, with mean and standard error (SE). Total value was computed based on species-level market prices obtained by The Nature Conservancy through market surveys (unpubl.). 'Opelu (mackerel scad, *Decapterus* spp) fraction of volume and value is also listed.

| <i>Trophic Group</i>         | <i>Weight (kg)</i> | <i>Fraction of total reported Catch (%)</i> | <i>Weight (kg)</i> | <i>Fraction of total reported catch that contain end use data (%)</i> | <i>Given Away (kg)</i> | <i>Kept (kg)</i> | <i>Sold (kg)</i> |
|------------------------------|--------------------|---------------------------------------------|--------------------|-----------------------------------------------------------------------|------------------------|------------------|------------------|
| Apex Predators               | 21.1               | 4                                           | 6.6                | 1.6                                                                   | 0                      | 1.1              | 0.5              |
| Secondary Consumers          | 415.3              | 35.6                                        | 114.6              | 33.5                                                                  | 19.4                   | 8.4              | 0                |
| Herbivores                   | 404.7              | 34.7                                        | 155.1              | 32                                                                    | 5.1                    | 30.1             | 2.5              |
| Planktivores                 | 284.7              | 24.4                                        | 128.5              | 31.2                                                                  | 8.2                    | 17.5             | 5.5              |
| Other                        | 15.1               | 1.3                                         | 6.8                | 1.7                                                                   | 0.8                    | 0.8              | 0                |
| <b>Breakdown by end-use:</b> |                    |                                             |                    |                                                                       | 33.50%                 | 58%              | 8.50%            |

**Table 5.** Weight of total reported catch and reported catch with post-landings disposition information, by trophic group, from Kīholo Bay surveys.

| <i>Trophic Group</i> | <i>Economic Value based on MP</i> | <i>Fraction of total economic value (%)</i> | <i>Nutritional value (no. meals)</i> | <i>Fraction of meals (%)</i> |
|----------------------|-----------------------------------|---------------------------------------------|--------------------------------------|------------------------------|
| Apex Predators       | \$ 12,447                         | 16%                                         | 3,321                                | 11%                          |
| Secondary Consumers  | \$ 18,889                         | 24%                                         | 6,114                                | 20%                          |
| Herbivores           | \$ 29,247                         | 37%                                         | 10,945                               | 36%                          |
| Planktivores         | \$ 17,849                         | 23%                                         | 10,107                               | 33%                          |
| TOTAL                | \$ 78,432                         | 100%                                        | 30,487                               | 100%                         |

**Table 6.** Economic and nutritional value of total reconstructed catch for Kīholo Bay (May 1, 2012 – April 30, 2013). MP is market price. Expanded catch by species was paired with market value (TNC, unpublished data). Number of meals assumes 6-ounce servings. Fraction of meals is essentially the percentage of meals delivered by each trophic group for this study.

Data for Figure 2:

| MPA                                                                    | Apex predator biomass (g/m <sup>2</sup> ) | Herbivore biomass (g/m <sup>2</sup> ) | Secondary consumers biomass (g/m <sup>2</sup> ) | Planktivore biomass (g/m <sup>2</sup> ) | Total biomass (g/m <sup>2</sup> ) | Standard Error |
|------------------------------------------------------------------------|-------------------------------------------|---------------------------------------|-------------------------------------------------|-----------------------------------------|-----------------------------------|----------------|
| NWHI                                                                   | 150.49                                    | 115.29                                | 16.63                                           | 4.60                                    | 287.01                            | 17.73          |
| Kahoolawe                                                              | 18.69                                     | 36.83                                 | 32.49                                           | 18.96                                   | 106.97                            | 12.32          |
| MPA                                                                    | 2.02                                      | 31.84                                 | 16.20                                           | 1.66                                    | 51.73                             | 11.26          |
| Open                                                                   | 0.32                                      | 15.87                                 | 9.42                                            | 1.94                                    | 27.56                             | 1.40           |
| Kiholo Bay                                                             | 0.71                                      | 10.16                                 | 12.87                                           | 2.56                                    | 26.30                             | 2.06           |
| Notes:                                                                 |                                           |                                       |                                                 |                                         |                                   |                |
| Kiholo Bay estimates based on 2012 dataset (N=112) to match CREEL data |                                           |                                       |                                                 |                                         |                                   |                |
| Reference sites based on meta-fish database - broader time range       |                                           |                                       |                                                 |                                         |                                   |                |
| Sharks included as APEX predators                                      |                                           |                                       |                                                 |                                         |                                   |                |
| Piscivores lumped with                                                 |                                           |                                       |                                                 |                                         |                                   |                |

|                     |  |  |  |  |  |
|---------------------|--|--|--|--|--|
| secondary predators |  |  |  |  |  |
|---------------------|--|--|--|--|--|

Data for Figure 3:

Total Estimated Standing Stock of Resource Fish

| <i>Apex Predators (kg)</i> | <i>Herbivores (kg)</i> | <i>Secondary Consumers (kg)</i> | <i>Planktivores (kg)</i> | <i>Total (kg)</i> |
|----------------------------|------------------------|---------------------------------|--------------------------|-------------------|
| 1,538                      | 19,326                 | 22,663                          | 4,810                    | <b>48,337</b>     |

| <i>This study, Kīholo Bay, 2012-2013</i> | <i>Apex</i>      |                           |                  |                    |            | <i>Other (including invertebrates)</i> | <i>Total by gear type</i> | <i>% of total by gear type</i> |
|------------------------------------------|------------------|---------------------------|------------------|--------------------|------------|----------------------------------------|---------------------------|--------------------------------|
|                                          | <i>predators</i> | <i>Secondary Consumer</i> | <i>Herbivore</i> | <i>Planktivore</i> |            |                                        |                           |                                |
| Line Fishing                             | 843              | 284                       | 20               | 1891               | 0          | 3038                                   | 41.3                      |                                |
| Thrownet                                 | 0                | 159                       | 2279             | 16                 | 70         | 2524                                   | 34.3                      |                                |
| Spear                                    | 0                | 1038                      | 297              | 3                  | 0          | 1338                                   | 18.2                      |                                |
| Other                                    | 0                | 102                       | 284              | 0                  | 67         | 453                                    | 6.2                       |                                |
| <b>Total by trophic group</b>            | <b>843</b>       | <b>1583</b>               | <b>2880</b>      | <b>1909</b>        | <b>137</b> | <b><u>7353</u></b>                     |                           |                                |



|                             |    |    |    |    |   |
|-----------------------------|----|----|----|----|---|
| % of total by trophic group | 11 | 22 | 39 | 26 | 2 |
|-----------------------------|----|----|----|----|---|

| <i>Trophic Group</i> | <i>Given Away (lbs)</i> | <i>Kept (lbs)</i> | <i>Sold (lbs)</i> |
|----------------------|-------------------------|-------------------|-------------------|
| Apex Predator        | 0.0                     | 9.7               | 4.8               |
| Secondary consumer   | 176.2                   | 76.5              | 0.0               |
| Herbivore            | 46.2                    | 273.2             | 22.5              |
| Planktivore          | 74.8                    | 158.9             | 49.6              |
| Other                | 7.5                     | 7.5               | 0.0               |

Data for Figure 4:

|      | <i>DAR Area 102 total reported catch (in thousands of kg)</i> | <i>Standard Error</i> | <i>Kiholo Bay reconstructed catch 5/2012-4/2013 (in thousands of kg)</i> | <i>Standard Error</i> |
|------|---------------------------------------------------------------|-----------------------|--------------------------------------------------------------------------|-----------------------|
| Line | 3.596                                                         | 0.899365696           | 3.038                                                                    | 0.6723                |

|          |       |             |       |         |
|----------|-------|-------------|-------|---------|
| Fishing  |       |             |       |         |
| Thrownet | 2.272 | 0.79450975  | 2.524 | 0.90935 |
| Spear    | 0.303 | 0.130370398 | 1.339 | 0.5494  |
| Other    | 0.047 | 0.04277096  | 0.452 | 0.37985 |

Data for Figure 5:

| Excel name | Distribution Location | Counts for District  | Counts for Town | Longitude | Latitude | Number of Distribution Events | Number of Keep Distr Events | Number of Give Away Distr Events |
|------------|-----------------------|----------------------|-----------------|-----------|----------|-------------------------------|-----------------------------|----------------------------------|
| GIS name   | Location              |                      |                 | longitude | latitude | Dst_Ev                        | DstEvKP                     | DstEvGA                          |
|            | Hamakua               | Hamakua              | Yes - * a       | -155.55   | 20       | 2                             | 2                           | 0                                |
|            | Hilo                  | Hilo                 | Hilo            | -155.090  | 19.730   | 8                             | 4                           | 1                                |
|            | Honoka'a              | Hamakua              | Honoka'a        | -155.473  | 20.083   | 3                             | 1                           | 2                                |
|            | Kalaoa                | North Kona           | Kalaoa          | -155.982  | 19.729   | 2                             | 1                           | 1                                |
|            | Kawaihae              | South Kohala         | Kawaihae        | -155.827  | 20.035   | 1                             | 1                           | 0                                |
|            | Kealakehe             | North Kona           | Kealakehe       | -155.992  | 19.670   | 1                             | 1                           | 0                                |
|            | Kiholo                | North Kona           | Kīholo          | -155.924  | 19.858   | 10                            | 9                           | 0                                |
|            | Kohala                | North + South Kohala | Yes - * c       | -155.794  | 20.132   | 9                             | 8                           | 1                                |
|            | Kona                  | North Kona           | Yes - * b       | -155.996  | 19.641   | 23                            | 18                          | 5                                |
|            | Pu'uanahulu           | North Kona           | Pu'uanahulu     | -155.847  | 19.818   | 5                             | 5                           | 0                                |
|            | Waikoloa              | South Kohala         | Waikoloa        | -155.793  | 19.941   | 10                            | 7                           | 3                                |

|  |        |              |        |          |       |    |   |   |
|--|--------|--------------|--------|----------|-------|----|---|---|
|  | Waimea | South Kohala | Waimea | -155.672 | 20.02 | 12 | 8 | 4 |
|--|--------|--------------|--------|----------|-------|----|---|---|
