# Supplementary material for: From Reef to Table: Social and Ecological Factors Affecting Coral Reef Fisheries, Artisanal Seafood Supply Chains, and Seafood Security
Source: PubMed Central journal article supplement (PMC4526684; doi:10.1371/journal.pone.0123856), 2015-08-05
Supplement: pone.0123856.s003.pdf [file pone.0123856.s003.pdf]

## S1 Table.

Biomass at different marine protected areas (MPA) within the West Hawaii Regional Fishery Management Area (WHRFMA). Apex\_bio stands for apex predator biomass (without sharks), H\_bio stands for herbivore biomass, P\_bio stands for piscivores biomass, S\_bio stands for secondary consumer biomass, Z\_bio stands for planktivores, and SHRK\_bio stands for shark biomass. The units here are grams per meter squared.

| MPA_name         | Mgmt_status       | APEX_bio | H_bio | P_bio | S_bio | Z_bio | SHRK_bio | Tot_Bio | Std_Er |
|------------------|-------------------|----------|-------|-------|-------|-------|----------|---------|--------|
| Old Kona Airport | Restricted access | 0.00     | 89.03 | 6.47  | 15.01 | 0.10  | 0.00     | 110.61  |        |
| Old Kona Airport | Partial           | 1.06     | 39.25 | 10.56 | 12.80 | 0.73  | 0.00     | 64.39   |        |
| Kealakekua Bay   | Full              | 6.11     | 19.18 | 6.66  | 22.11 | 4.23  | 0.00     | 58.29   |        |
| Lapakahi         | Partial           | 0.59     | 17.19 | 6.57  | 11.01 | 6.04  | 0.00     | 41.41   |        |
| Waialea Bay      | Partial           | 1.01     | 24.66 | 1.81  | 1.95  | 0.21  | 0.00     | 29.63   |        |
| Kealakekua Bay   | Partial           | 0.16     | 15.49 | 3.11  | 7.66  | 0.30  | 4.60     | 31.32   |        |
| Lapakahi         | Full              | 0.59     | 18.11 | 2.10  | 5.57  | 0.04  | 0.00     | 26.42   |        |
| <b>AVERAGE</b>   |                   | 1.36     | 31.84 | 5.33  | 10.87 | 1.66  | 0.66     | 51.73   | 11.26  |
