# Supplementary material for: From Reef to Table: Social and Ecological Factors Affecting Coral Reef Fisheries, Artisanal Seafood Supply Chains, and Seafood Security
Source: PubMed Central journal article supplement (PMC4526684; doi:10.1371/journal.pone.0123856), 2015-08-05
Supplement: pone.0123856.s004.pdf [file pone.0123856.s004.pdf]

# S2 Table. Fishing Effort Survey

## Fishing Effort Survey

Kīholo Bay, Hawai'i Island

Date: \_\_\_\_\_ Surveyor Name: \_\_\_\_\_

Survey Time Frame (Circle One):    7am-10am    10am-1pm    1pm-4pm    4pm-7pm

Zone (Circle one):    1    2    3

Weather Condition (Circle one):    Sunny    Rainy    Overcast

Wind/Water Condition (Circle one):    Calm/Clear    Kona    Normal Trades    Gusty/Rough

Tide Condition (Circle one):    Rising    Dropping    Slack

| Event # | Zone | Time start | Time Stop | Gear Type/Activity | Boat-Based? Y/N | # of Gears | # of Fishers | Catch (if ID) | Notes/Observations |
|---------|------|------------|-----------|--------------------|-----------------|------------|--------------|---------------|--------------------|
| 1       |      |            |           |                    |                 |            |              |               |                    |
| 2       |      |            |           |                    |                 |            |              |               |                    |
| 3       |      |            |           |                    |                 |            |              |               |                    |
| 4       |      |            |           |                    |                 |            |              |               |                    |
| 5       |      |            |           |                    |                 |            |              |               |                    |
| 6       |      |            |           |                    |                 |            |              |               |                    |
| 7       |      |            |           |                    |                 |            |              |               |                    |
| 8       |      |            |           |                    |                 |            |              |               |                    |
| 9       |      |            |           |                    |                 |            |              |               |                    |
| 10      |      |            |           |                    |                 |            |              |               |                    |

Notes:
