# Supplementary material for: From Reef to Table: Social and Ecological Factors Affecting Coral Reef Fisheries, Artisanal Seafood Supply Chains, and Seafood Security
Source: PubMed Central journal article supplement (PMC4526684; doi:10.1371/journal.pone.0123856), 2015-08-05
Supplement: pone.0123856.s005.pdf [file pone.0123856.s005.pdf]

# S3 Table. Fish Flow Survey

## Fishing Intercept Survey Form

Gender: M F Age: \_\_\_\_\_  
 Education level \_\_\_\_\_ Occupation \_\_\_\_\_  
 Birthplace: \_\_\_\_\_ Currently resides: \_\_\_\_\_  
 Ethnicity \_\_\_\_\_ Native Hawaiian? Y N

| Gear type/<br>Activity | Species/<br>Family | #<br>Caught  | #<br>(Act/<br>Est) | Weight<br>(lbs) | Weight<br>(Act/<br>Est) | Zone        | Notes |
|------------------------|--------------------|--------------|--------------------|-----------------|-------------------------|-------------|-------|
|                        |                    |              | A/E                |                 | A/E                     | 1<br>2<br>3 |       |
|                        |                    |              | A/E                |                 | A/E                     | 1<br>2<br>3 |       |
|                        |                    |              | A/E                |                 | A/E                     | 1<br>2<br>3 |       |
|                        |                    |              | A/E                |                 | A/E                     | 1<br>2<br>3 |       |
|                        |                    |              | A/E                |                 | A/E                     | 1<br>2<br>3 |       |
|                        |                    |              | A/E                |                 | A/E                     | 1<br>2<br>3 |       |
|                        |                    |              | A/E                |                 | A/E                     | 1<br>2<br>3 |       |
|                        |                    |              | A/E                |                 | A/E                     | 1<br>2<br>3 |       |
| <b>TOTALS</b>          |                    |              |                    |                 |                         |             |       |
| # Gears                | # Species          | Weight (lbs) |                    |                 | # hours fished          |             |       |
|                        |                    |              |                    |                 |                         |             |       |

Notes:

## Fish Flow data

Event # 1

|               | % | Check any/all that apply:                                             | LOCATION (use map on following page) |                                                   |                          |
|---------------|---|-----------------------------------------------------------------------|--------------------------------------|---------------------------------------------------|--------------------------|
|               |   |                                                                       | Code<br>(for map<br>entry)**         | Address, closest cross-street, town, or ahupua'a: |                          |
| % KEPT:       |   |                                                                       | 1                                    |                                                   |                          |
| % GIVEN AWAY: |   | <input type="checkbox"/> Family (outside household)                   | 2                                    |                                                   |                          |
|               |   | <input type="checkbox"/> Family (outside household)                   | 3                                    |                                                   |                          |
|               |   | <input type="checkbox"/> Friends                                      | 4                                    |                                                   |                          |
|               |   | <input type="checkbox"/> Friends                                      | 5                                    |                                                   |                          |
|               |   | <input type="checkbox"/> Specifically for pa'ina                      | 6                                    |                                                   |                          |
|               |   | <input type="checkbox"/> Other<br>List:                               | 7                                    |                                                   |                          |
|               | % | Check any/all that apply:                                             | LOCATION (use map on following page) |                                                   | PRICE<br>(or \$\$ value) |
|               |   |                                                                       | Code<br>(for map<br>entry)**         | Address, closest cross-street, town or ahupua'a:  |                          |
| % FOR SALE:   |   | <input type="checkbox"/> Friends/family                               | 8                                    |                                                   |                          |
|               |   | <input type="checkbox"/> Friends/family                               | 9                                    |                                                   |                          |
|               |   | <input type="checkbox"/> Local minimarket/grocer                      | 10                                   |                                                   |                          |
|               |   | <input type="checkbox"/> Local minimarket/grocer                      | 11                                   |                                                   |                          |
|               |   | <input type="checkbox"/> Open market                                  | 12                                   |                                                   |                          |
|               |   | <input type="checkbox"/> Open market                                  | 13                                   |                                                   |                          |
|               |   | <input type="checkbox"/> Foodland                                     | 14                                   |                                                   |                          |
|               |   | <input type="checkbox"/> Distributor                                  | 15                                   |                                                   |                          |
|               |   | <input type="checkbox"/> Traded<br>Who?                               | 16                                   |                                                   |                          |
|               |   | <input type="checkbox"/> Other (auction, restaurant,<br>etc)<br>List: | 17                                   |                                                   |                          |
| % RE-LEASED:  |   | Reason:                                                               |                                      |                                                   |                          |
| % OTHER:      |   | List:                                                                 | 18                                   |                                                   |                          |
| TOTAL = 100   |   |                                                                       |                                      |                                                   |                          |

\*\* Maps found at end of booklet. One map per event.
