# Supplementary material for: From Reef to Table: Social and Ecological Factors Affecting Coral Reef Fisheries, Artisanal Seafood Supply Chains, and Seafood Security
Source: PubMed Central journal article supplement (PMC4526684; doi:10.1371/journal.pone.0123856), 2015-08-05
Supplement: pone.0123856.s006.pdf [file pone.0123856.s006.pdf]

## S4 Table.

Average daily fishing effort (gear-hour/day) and number of survey days and days for each quarter.

| Quarter | Days in each Quarter | Survey Days | HandPole | Rod&Pole | ThrowNet | Spear | Opihi | Crabbing | Other | Aquarium | FlyFishing |
|---------|----------------------|-------------|----------|----------|----------|-------|-------|----------|-------|----------|------------|
| 1       | 92                   | 20          | 0.40     | 9.44     | 4.29     | 2.31  | 0.70  | 0.00     | 0.72  | 0.77     | 0.20       |
| 2       | 92                   | 18          | 26.60    | 3.96     | 2.36     | 4.42  | 0.00  | 1.50     | 0.08  | 0.00     | 0.11       |
| 3       | 92                   | 12          | 1.42     | 6.52     | 2.77     | 0.67  | 2.42  | 0.00     | 0.00  | 0.00     | 0.25       |
| 4       | 89                   | 17          | 0.00     | 4.49     | 5.97     | 0.75  | 2.44  | 0.00     | 0.00  | 0.00     | 0.00       |
