# Supplementary material for: From Reef to Table: Social and Ecological Factors Affecting Coral Reef Fisheries, Artisanal Seafood Supply Chains, and Seafood Security
Source: PubMed Central journal article supplement (PMC4526684; doi:10.1371/journal.pone.0123856), 2015-08-05
Supplement: pone.0123856.s007.pdf [file pone.0123856.s007.pdf]

## S5 Table.

Expanded fishing effort (in gear-hour) and total fishing effort for each gear type.

| Quarter | HandPole | Rod&Pole | ThrowNet | Spear  | Opihi  | Crabbing | Other | Aquarium | FlyFishing |
|---------|----------|----------|----------|--------|--------|----------|-------|----------|------------|
| 1       | 36.80    | 868.87   | 394.46   | 212.75 | 64.40  | 0.00     | 66.13 | 70.73    | 18.40      |
| 2       | 2446.94  | 364.17   | 217.22   | 406.33 | 0.00   | 138.00   | 7.67  | 0.00     | 10.22      |
| 3       | 130.33   | 599.92   | 254.92   | 61.33  | 222.33 | 0.00     | 0.00  | 0.00     | 23.00      |
| 4       | 0.00     | 399.19   | 531.38   | 66.75  | 217.26 | 0.00     | 0.00  | 0.00     | 0.00       |
| Total   | 2614.08  | 2232.14  | 1397.98  | 747.17 | 504.00 | 138.00   | 73.80 | 70.73    | 51.62      |
