# Supplementary material for: From Reef to Table: Social and Ecological Factors Affecting Coral Reef Fisheries, Artisanal Seafood Supply Chains, and Seafood Security
Source: PubMed Central journal article supplement (PMC4526684; doi:10.1371/journal.pone.0123856), 2015-08-05
Supplement: pone.0123856.s008.pdf [file pone.0123856.s008.pdf]

## S6 Table.

Summary of CPUE (kg/gear-hour) for each gear type between May 2012 – April 2013.

| Gear Type | # of Interview | Q1   | Q2   | Q3   | Q4   | Yearly Mean |
|-----------|----------------|------|------|------|------|-------------|
| Spear     | 15             | 1.32 | 1.24 | 5.22 | 0.91 | 1.79        |
| Throw Net | 43             | 1.17 | 1.03 | 2.64 | 2.21 | 1.81        |
| Crabbing  | 3              | NA   | 0.72 | NA   | NA   | 0.72        |
| Rod&Pole  | 17             | 0.95 | 1.10 | 0.04 | NA   | 0.89        |
| Opihi     | 6              | NA   | NA   | 1.24 | 0.15 | 0.69        |
| Hand Pole | 21             | 0.00 | 0.41 | 0.50 | NA   | 0.40        |
| Other     | 1              | 0.03 | NA   | NA   | NA   | 0.03        |
| Aquarium  | 1              | 0.00 | NA   | NA   | NA   | 0.00        |
