# Supplementary material for: From Reef to Table: Social and Ecological Factors Affecting Coral Reef Fisheries, Artisanal Seafood Supply Chains, and Seafood Security
Source: PubMed Central journal article supplement (PMC4526684; doi:10.1371/journal.pone.0123856), 2015-08-05
Supplement: pone.0123856.s009.pdf [file pone.0123856.s009.pdf]

## S7 Table.

Annual expected catch (kg) for each gear type.

| Expanded Catch    | HandPole | Rod &Pole | ThrowNet | Spear   | Opihi  | Crabbing | Other |
|-------------------|----------|-----------|----------|---------|--------|----------|-------|
| Yearly Mean CPUE  | 0.40     | 0.89      | 1.81     | 1.79    | 0.69   | 0.72     | 0.03  |
| Q1                | 14.69    | 776.40    | 712.12   | 381.18  | 44.79  | 0.00     | 2.10  |
| Q2                | 976.72   | 325.41    | 392.15   | 728.02  | 0.00   | 99.55    | 0.24  |
| Q3                | 52.02    | 536.07    | 460.20   | 109.89  | 154.63 | 0.00     | 0.00  |
| Q4                | 0.00     | 356.71    | 959.30   | 119.59  | 151.11 | 0.00     | 0.00  |
| Total Catch (lbs) | 1043.44  | 1994.59   | 2523.77  | 1338.69 | 350.53 | 100.27   | 2.35  |
