# Supplementary material for: From Reef to Table: Social and Ecological Factors Affecting Coral Reef Fisheries, Artisanal Seafood Supply Chains, and Seafood Security
Source: PubMed Central journal article supplement (PMC4526684; doi:10.1371/journal.pone.0123856), 2015-08-05
Supplement: pone.0123856.s010.pdf [file pone.0123856.s010.pdf]

## S8 Table.

Species-specific estimates for edible weight conversions from live weight, provided by local fishermen's traditional ecological knowledge.

| Hawaiian Name | English Name                      | Latin Name                | Edible Weight Fraction |
|---------------|-----------------------------------|---------------------------|------------------------|
| Aama          | Rock crab                         | Grapsus tenuicrustatus    | 0.50                   |
| Aholehole     | Hawaiian Flagtail                 | Kuhlia sandvicensis       | 0.67                   |
| Aala.ihii     | Bluestripe squirrelfish           | Sargocentron tiere        | 0.67                   |
| Halalu        | Bigeye scad                       | Selar crumenophthalmus    | 0.90                   |
| Hinalea       |                                   |                           | 0.67                   |
| Kala          | Bluespine unicornfish             | Naso unicornis            | 0.80                   |
| Kole          | Goldenring surgeonfish            | Ctenochaetus strigosus    | 0.67                   |
| Kumu          | Whitesaddle goatfish              | Parupeneus porphyreus     | 0.67                   |
| Kupipi        | Blackspot sergeant                | Abudefduf sordidus        | 0.67                   |
| Maiko         | Bluelined Surgeonfish             | Acanthurus nigroris       | 0.67                   |
| Manini        | Convict Tang                      | Acanthurus triostegus     | 0.67                   |
| Mempachi      | Soldierfish                       | Myripristis spp           | 0.67                   |
| Moana.Kali    | Gold-saddle goatfish              | Parupeneus cyclostomus    | 0.67                   |
| Moano         | Manybar Goatfish                  | Parupeneus multifasciatus | 0.67                   |
| Mullet        | Mullet                            | Neomyxus leuciscus        | 0.67                   |
| Nainai        | Orangeband Surgeonfish            | Acanthurus olivaceus      | 0.67                   |
| Nenui         | Chub                              | Kyphosus Vaigiensis       | 0.67                   |
| Oama          | baby Orange goatfish              | Mulloidichthys pfluegeri  | 0.90                   |
| Omamalei      | Orangespine Unicornfish           | Naso lituratus            | 0.80                   |
| Omilu         | Bluefin Trevally                  | Caranx melampygus         | 0.67                   |
| Opihi         | Limpet                            | Tectura scutum            | 0.50                   |
| Pakukui       | Achilles Tang                     | Acanthurus achilles       | 0.67                   |
| Papio         | Juvenile Trevally (ulua) (<10lbs) | Caranx ignobilis          | 0.67                   |
| Roi           | Peacock grouper                   | Cephalopholis argus       | 0.67                   |
| Taape         | Bluestripe snapper                | Lutjanus kasmira          | 0.67                   |
| Toao          | Blacktail snapper                 | Lutjanus fulvus           | 0.67                   |
| Uhu           | Bullethead parrotfish             | Chlorurus spilurus        | 0.67                   |
| Ulua          | Giant Trevally (Big Jack)         | Caranx ignobilis          | 0.67                   |
| Uo.Uoa        | Sharpnose mullet                  | Neomyxus leuciscus        | 0.67                   |
| Weke          | Goatfish                          | Mulloidichthys spp        | 0.67                   |
