# Supplementary material for: From Reef to Table: Social and Ecological Factors Affecting Coral Reef Fisheries, Artisanal Seafood Supply Chains, and Seafood Security
Source: PubMed Central journal article supplement (PMC4526684; doi:10.1371/journal.pone.0123856), 2015-08-05
Supplement: pone.0123856.s011.pdf [file pone.0123856.s011.pdf]

## S9 Table.

Creel survey and expanded catch from Kīholo Bay, by gear type and trophic group, compared to DLNR reported catch for 2009-2013 for reporting block 102, where Kīholo is contained. All values reported in kilograms. These gear types are grouped by fishing methods in manuscript figures (line fishing includes rod and reel as well as handpole for Kiholo Bay; handline is grouped under line fishing for DLNR commercial data).

| <b><i>This study, Kīholo Bay, 2012-2013</i></b> | <b><i>Apex</i></b> | <b><i>Secondary Consumer</i></b> | <b><i>Herbivore</i></b> | <b><i>Planktivore</i></b> | <b><i>Other (including invertebrates)</i></b> | <b><i>Total by gear type</i></b> |
|-------------------------------------------------|--------------------|----------------------------------|-------------------------|---------------------------|-----------------------------------------------|----------------------------------|
| Line Fishing                                    | 842.6              | 284.2                            | 20.2                    | 1891                      | 0                                             | 3038                             |
| Thrownet                                        | 0                  | 158.8                            | 2279.1                  | 15.75                     | 70.1                                          | 2523.8                           |
| Spear                                           | 0                  | 1038.1                           | 297.4                   | 3.2                       | 0                                             | 1338.7                           |
| Other                                           | 0                  | 101.9                            | 283.5                   | 0                         | 67.1                                          | 452.4                            |
| <b>Total:</b>                                   | <b>842.6</b>       | <b>1583</b>                      | <b>2880.2</b>           | <b>1909.9</b>             | <b>137.2</b>                                  | <b>7352.9</b>                    |
| <b><i>DLNR, 2009</i></b>                        | <b><i>Apex</i></b> | <b><i>Secondary Consumer</i></b> | <b><i>Herbivore</i></b> | <b><i>Planktivore</i></b> | <b><i>Other (including invertebrates)</i></b> |                                  |
| Line Fishing                                    | 1,223              | 483                              | 0                       | 2,152                     | 0                                             | 3858                             |
| Thrownet                                        | 0                  | 326                              | 0                       | 0                         | 0                                             | 326                              |
| Spear/Dive                                      | 0                  | 36                               | 10                      | 0                         | 0                                             | 46                               |
| Troll                                           | 16                 | 0                                | 0                       | 0                         | 0                                             | 16                               |
| <b>Totals:</b>                                  | <b>1,239</b>       | <b>845</b>                       | <b>10</b>               | <b>2,152</b>              | <b>0</b>                                      | <b>4246</b>                      |
| <b><i>DLNR, 2010</i></b>                        | <b><i>Apex</i></b> | <b><i>Secondary Consumer</i></b> | <b><i>Herbivore</i></b> | <b><i>Planktivore</i></b> | <b><i>Other (including invertebrates)</i></b> |                                  |
| Line Fishing                                    | 1,899              | 382                              | 45                      | 3,951                     | 0                                             | 6277                             |
| Thrownet                                        | 0                  | 327                              | 0                       | 0                         | 0                                             | 327                              |
| Spear/Dive                                      | 0                  | 255                              | 0                       | 0                         | 0                                             | 255                              |
| Troll                                           | 0                  | 0                                | 0                       | 0                         | 0                                             | 0                                |
| <b>Totals:</b>                                  | <b>1,899</b>       | <b>964</b>                       | <b>45</b>               | <b>3,951</b>              | <b>0</b>                                      | <b>6859</b>                      |
| <b><i>DLNR, 2011</i></b>                        | <b><i>Apex</i></b> | <b><i>Secondary Consumer</i></b> | <b><i>Herbivore</i></b> | <b><i>Planktivore</i></b> | <b><i>Other (including invertebrates)</i></b> |                                  |
| Line Fishing                                    | 3,102              | 393                              | 14                      | 1,060                     | 0                                             | 4569                             |
| Thrownet                                        | 0                  | 348                              | 0                       | 3,195                     | 0                                             | 3543                             |
| Spear/Dive                                      | 0                  | 268                              | 0                       | 0                         | 0                                             | 268                              |
| Troll                                           | 0                  | 0                                | 0                       | 0                         | 0                                             | 0                                |
| <b>Totals:</b>                                  | <b>3,102</b>       | <b>1,009</b>                     | <b>14</b>               | <b>4,255</b>              | <b>0</b>                                      | <b>8380</b>                      |
| <b><i>DLNR, 2012</i></b>                        | <b><i>Apex</i></b> | <b><i>Secondary Consumer</i></b> | <b><i>Herbivore</i></b> | <b><i>Planktivore</i></b> | <b><i>Other (including invertebrates)</i></b> |                                  |
| Line Fishing                                    | 991                | 308                              | 0                       | 734                       | 0                                             | 2033                             |
| Thrownet                                        | 0                  | 164                              | 0                       | 3,452                     | 0                                             | 3616                             |
| Spear/Dive                                      | 0                  | 687                              | 112                     | 0                         | 0                                             | 799                              |
| Troll                                           | 0                  | 0                                | 0                       | 0                         | 0                                             | 0                                |
| <b>Totals:</b>                                  | <b>991</b>         | <b>1,158</b>                     | <b>112</b>              | <b>4,186</b>              | <b>0</b>                                      | <b>6448</b>                      |
| <b><i>DLNR, 2013</i></b>                        | <b><i>Apex</i></b> | <b><i>Secondary Consumer</i></b> | <b><i>Herbivore</i></b> | <b><i>Planktivore</i></b> | <b><i>Other (including invertebrates)</i></b> |                                  |
| Line Fishing                                    | 588                | 63                               | 19                      | 574                       | 0                                             | 1244                             |
| Thrownet                                        | 0                  | 224                              | 0                       | 3,326                     | 0                                             | 3549                             |
| Spear/Dive                                      | 0                  | 148                              | 0                       | 0                         | 0                                             | 148                              |
| Troll                                           | 217                | 0                                | 0                       | 0                         | 0                                             | 217                              |
| <b>Totals:</b>                                  | <b>806</b>         | <b>434</b>                       | <b>19</b>               | <b>3,900</b>              | <b>0</b>                                      | <b>5159</b>                      |
