# Supplementary material for: From Reef to Table: Social and Ecological Factors Affecting Coral Reef Fisheries, Artisanal Seafood Supply Chains, and Seafood Security
Source: PubMed Central journal article supplement (PMC4526684; doi:10.1371/journal.pone.0123856), 2015-08-05
Supplement: pone.0123856.s012.pdf [file pone.0123856.s012.pdf]

## S10 Table.

DLNR reported catch for 2009-2013 for reporting block 102, with catch value, and fraction of annual catch and annual value represented by each species.

| Year | Method     | Species      | Lbs caught    | Kg caught    | Trophic Group      | % of annual catch | % of annual value |
|------|------------|--------------|---------------|--------------|--------------------|-------------------|-------------------|
| 2009 | Handline   | Opelu        | 4,744         | 2,152        | Planktivore        | 50.7              | 44.1              |
| 2009 | Handline   | Uku          | 2,065         | 937          | Apex Predator      | 22.1              | 28.8              |
| 2009 | Handline   | Menpachi     | 964           | 437          | Secondary consumer | 10.3              | 15.7              |
| 2009 | Handline   | Kahala       | 545           | 247          | Apex Predator      | 5.8               | 5.6               |
| 2009 | Handline   | Laenihi      | 92            | 42           | Secondary consumer | 1.0               | 2.6               |
| 2009 | Handline   | Kamanu       | 46            | 21           | Apex Predator      | 0.5               | N/A               |
| 2009 | Handline   | White ulua   | 41            | 19           | Apex Predator      | 0.4               | 0.6               |
| 2009 | Handline   | Taape        | 9             | 4            | Secondary consumer | 0.1               | 0.1               |
| 2009 | Net        | Kona crab    | 718           | 326          | Secondary consumer | 7.7               | N/A               |
| 2009 | Spear/Dive | Roi          | 60            | 27           | Secondary consumer | 0.6               | 1.0               |
| 2009 | Spear/Dive | Palani       | 21            | 10           | Herbivore          | 0.2               | 0.1               |
| 2009 | Spear/Dive | Menpachi     | 20            | 9            | Secondary consumer | 0.2               | 0.3               |
| 2009 | Troll      | Kaku         | 35            | 16           | Apex Predator      | 0.4               | 1.1               |
|      |            | <b>TOTAL</b> | <b>9,360</b>  | <b>4,246</b> |                    | <b>100</b>        | <b>100</b>        |
| 2010 | Handline   | Opelu        | 8,521         | 3,865        | Planktivore        | 56.4              | 48.8              |
| 2010 | Handline   | Uku          | 2,701         | 1,225        | Apex Predator      | 17.9              | 23.2              |
| 2010 | Handline   | Kahala       | 1,166         | 529          | Apex Predator      | 7.7               | 7.3               |
| 2010 | Handline   | Laenihi      | 598           | 271          | Secondary consumer | 4.0               | 10.2              |
| 2010 | Handline   | White ulua   | 268           | 122          | Apex Predator      | 1.8               | 2.4               |
| 2010 | Handline   | Taape        | 162           | 73           | Secondary consumer | 1.1               | 0.6               |
| 2010 | Handline   | Akule        | 160           | 73           | Planktivore        | 1.1               | 1.1               |
| 2010 | Handline   | Opelu kala   | 99            | 45           | Herbivore          | 0.7               | 0.3               |
| 2010 | Handline   | Kamanu       | 52            | 24           | Apex Predator      | 0.3               | N/A               |
| 2010 | Handline   | Weke nono    | 49            | 22           | Secondary consumer | 0.3               | 0.4               |
| 2010 | Handline   | Aawa         | 20            | 9            | Secondary consumer | 0.1               | 0.1               |
| 2010 | Handline   | Weke ula     | 20            | 9            | Planktivore        | 0.1               | 0.2               |
| 2010 | Handline   | Toau         | 13            | 6            | Secondary consumer | 0.1               | 0.1               |
| 2010 | Handline   | Moana kale   | 9             | 4            | Planktivore        | 0.1               | 0.2               |
| 2010 | Net        | Kona crab    | 721           | 327          | Secondary consumer | 4.8               | N/A               |
| 2010 | Spear/Dive | Day tako     | 402           | 182          | Secondary consumer | 2.7               | 3.5               |
| 2010 | Spear/Dive | Menpachi     | 160           | 73           | Secondary consumer | 1.1               | 1.6               |
|      |            | <b>TOTAL</b> | <b>15,121</b> | <b>6,859</b> |                    | <b>100</b>        | <b>100</b>        |
| 2011 | Handline   | Uku          | 6,524         | 2,959        | Apex Predator      | 35.3              | 43.9              |
| 2011 | Handline   | Opelu        | 1,772         | 804          | Planktivore        | 9.6               | 7.9               |
| 2011 | Handline   | Menpachi     | 591           | 268          | Secondary consumer | 3.2               | 4.6               |
| 2011 | Handline   | Akule        | 565           | 256          | Planktivore        | 3.1               | 2.9               |
| 2011 | Handline   | Kahala       | 315           | 143          | Apex Predator      | 1.7               | 1.6               |
| 2011 | Handline   | Laenihi      | 230           | 104          | Secondary consumer | 1.2               | 3.1               |
| 2011 | Handline   | Taape        | 45            | 20           | Secondary consumer | 0.2               | 0.1               |
| 2011 | Handline   | Opelu kala   | 30            | 14           | Herbivore          | 0.2               | 0.1               |
| 2011 | Net        | Opelu        | 7,043         | 3,195        | Planktivore        | 38.1              | 31.6              |
| 2011 | Net        | Kona crab    | 768           | 348          | Secondary consumer | 4.2               | N/A               |
| 2011 | Spear/Dive | Day tako     | 591           | 268          | Secondary consumer | 3.2               | 4.1               |
|      |            | <b>TOTAL</b> | <b>18,474</b> | <b>8,380</b> |                    | <b>100</b>        | <b>100</b>        |

|      |            |                  |               |              |                    |  |            |            |
|------|------------|------------------|---------------|--------------|--------------------|--|------------|------------|
| 2012 | Handline   | Uku              | 1,997         | 906          | Apex Predator      |  | 14.0       | 17.8       |
| 2012 | Handline   | Opelu            | 1,265         | 574          | Planktivore        |  | 8.9        | 7.5        |
| 2012 | Handline   | Laenihi          | 386           | 175          | Secondary consumer |  | 2.7        | 6.9        |
| 2012 | Handline   | Akule            | 327           | 148          | Planktivore        |  | 2.3        | 2.3        |
| 2012 | Handline   | Kahala           | 160           | 73           | Apex Predator      |  | 1.1        | 1.0        |
| 2012 | Handline   | Weke nono        | 125           | 57           | Secondary consumer |  | 0.9        | 1.0        |
| 2012 | Handline   | Menpachi         | 110           | 50           | Secondary consumer |  | 0.8        | 1.1        |
| 2012 | Handline   | Weke ula         | 39            | 18           | Secondary consumer |  | 0.3        | 0.3        |
| 2012 | Handline   | Kamanu           | 28            | 13           | Apex Predator      |  | 0.2        | N/A        |
| 2012 | Handline   | Aweoweo          | 26            | 12           | Planktivore        |  | 0.2        | 0.2        |
| 2012 | Handline   | Taape            | 18            | 8            | Secondary consumer |  | 0.1        | 0.1        |
| 2012 | Net        | Opelu            | 7,610         | 3,452        | Planktivore        |  | 53.5       | 45.2       |
| 2012 | Net        | Kona crab        | 362           | 164          | Secondary consumer |  | 2.5        | N/A        |
| 2012 | Spear/Dive | Day tako         | 1,373         | 623          | Secondary consumer |  | 9.7        | 12.6       |
| 2012 | Spear/Dive | Uhu parrot-misc. | 248           | 112          | Herbivore          |  | 1.7        | 2.2        |
| 2012 | Spear/Dive | Menpachi         | 70            | 32           | Secondary consumer |  | 0.5        | 0.7        |
| 2012 | Spear/Dive | Kumu             | 40            | 18           | Secondary consumer |  | 0.3        | 0.8        |
| 2012 | Spear/Dive | Mu               | 31            | 14           | Secondary consumer |  | 0.2        | 0.3        |
|      |            | <b>TOTAL</b>     | <b>14,215</b> | <b>6,448</b> |                    |  | <b>100</b> | <b>100</b> |
| 2013 | Handline   | Opelu            | 767           | 348          | Planktivore        |  | 6.7        | 6.4        |
| 2013 | Handline   | Uku              | 682           | 309          | Apex Predator      |  | 6.0        | 8.5        |
| 2013 | Handline   | Kahala           | 615           | 279          | Apex Predator      |  | 5.4        | 5.6        |
| 2013 | Handline   | Akule            | 499           | 226          | Planktivore        |  | 4.4        | 4.8        |
| 2013 | Handline   | Laenihi          | 107           | 49           | Secondary consumer |  | 0.9        | 2.7        |
| 2013 | Handline   | Opelu kala       | 42            | 19           | Herbivore          |  | 0.4        | 0.2        |
| 2013 | Handline   | Weke nono        | 32            | 14           | Secondary consumer |  | 0.3        | 0.4        |
| 2013 | Net        | Opelu            | 7,332         | 3,326        | Planktivore        |  | 64.5       | 61.2       |
| 2013 | Net        | Kona crab        | 493           | 224          | Secondary consumer |  | 4.3        | N/A        |
| 2013 | Spear/Dive | Day tako         | 326           | 148          | Secondary consumer |  | 2.9        | 4.2        |
| 2013 | Troll      | Uku              | 479           | 217          | Apex Predator      |  | 4.2        | 6.0        |
|      |            |                  | <b>11,374</b> | <b>5,159</b> |                    |  |            |            |
